# Supplementary material for: A nature-based health intervention at a military healthcare center: a randomized, controlled, cross-over study
Source: PeerJ. 2021 Jan 4;9:e10519. doi: 10.7717/peerj.10519 (PMC7789867; doi:10.7717/peerj.10519)
Supplement: Supplemental Information 5 [file peerj-09-10519-s005.xlsx]

## Sheet: for release
Varaiable	Distress.Green.pre	Distress.Green.post	Distress.Urban.pre	Distress.Urban.post	MAASpTotal.Green.pre	MAASpTotal.Green.post	MAASpTotal.Urban.pre	MAASpTotal.Urban.post
Label	Distress rating, pre Green walk	Distress rating, post Green walk	Distress rating, pre Urban walk	Distress rating, post Urban walk	MAAS score, pre Green walk	MAAS score, post-Green walk	MAAS score, pre Urban walk	MAAS score, post Urban walk
	2	0	3	2	5	4	9	8
	1	0	2	0	3	0	5	1
	0	0	0	0	5	5	9	3
	3	2.5	3	4.5	11	5	14	16
	2	1	2	4	0	2	2	2
	2	0	1	0	5	2	2	3
	1	0	1	1	3	0	1	2
	2	0	0	0	4	1	1	1
	4	0	1	1	11	0	2	3
	1	0	2	4	3	1	2	11
	1	0	1	.	12	4	14	5
	1	0	1	3	0	0	3	7
